# Supplementary material for: Polysulfide-mediating properties of nickel phosphide carbon composite nanofibers as free-standing interlayers for lithium–sulfur batteries
Source: Royal Society of Chemistry journal article supplement (doi:10.1039/d4ra07285e), 2024-01-01
Supplement: d4ra07285e1.pdf [file d4ra07285e1.pdf]

## Supporting information

### **Polysulfide-mediating properties of nickel phosphide carbon composite nanofibers as free-standing interlayers for lithium-sulfur batteries**

Ayaulym Belgibayeva<sup>1,\*</sup>, Gulderaiym Turarova<sup>1</sup>, Akmaral Dangaliyeva<sup>1</sup>, Fail Sultanov<sup>1</sup>,  
Arailym Nurpeissova<sup>1</sup>, Aliya Mukanova<sup>1,\*</sup>, Zhumabay Bakenov<sup>1,2,3\*</sup>

<sup>1</sup> National Laboratory Astana, Kabanbay Batyr Ave. 53, Astana 010000 Kazakhstan

<sup>2</sup> Department of Chemical and Materials Engineering, School of Engineering and Digital  
Sciences, Nazarbayev University, Kabanbay Batyr Ave. 53, Astana 010000 Kazakhstan

<sup>3</sup> Institute of Batteries LLC, Kabanbay Batyr Ave. 53, Astana 010000 Kazakhstan

#### **Corresponding Authors\***

E-mail: [ayaulym.belgibayeva@nu.edu.kz](mailto:ayaulym.belgibayeva@nu.edu.kz) (A.B.), [aliya.mukanova@nu.edu.kz](mailto:aliya.mukanova@nu.edu.kz) (A.M.),  
[zbakenov@nu.edu.kz](mailto:zbakenov@nu.edu.kz) (Z.B.)

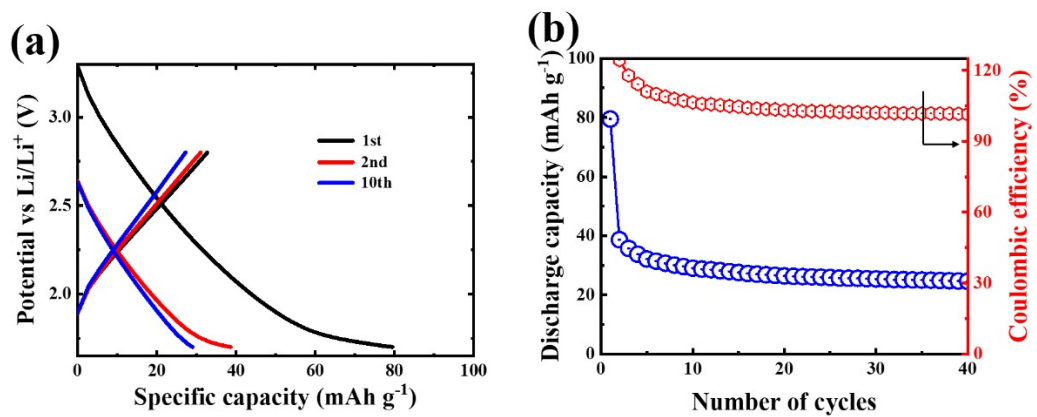

**Figure S1.** Potential profiles (a) and cycle performance (b) of the Ni<sub>x</sub>P/C fiber mat.

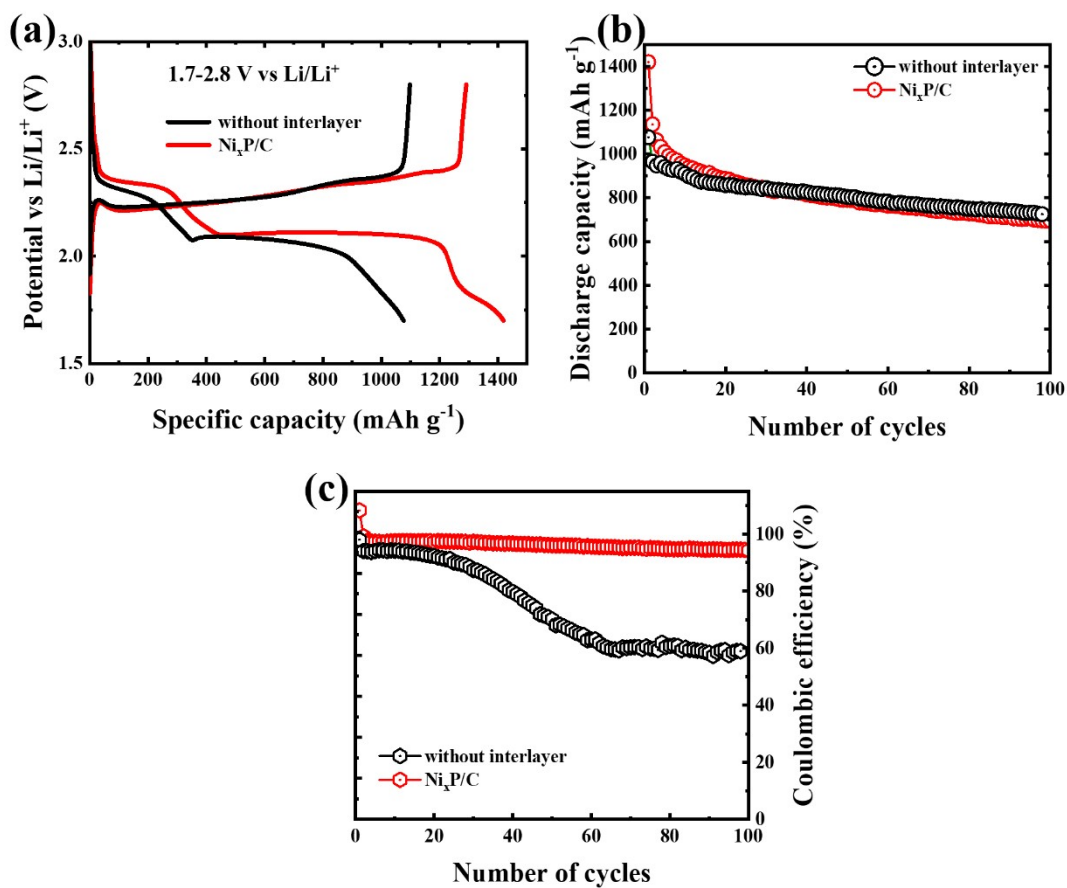

**Figure S2.** Initial potential profiles (a), cycle performance (b), and Coulombic efficiency (c) of the GPC@S|Li cells with and without the Ni<sub>x</sub>P/C interlayer in the potential range of 1.7–2.8 V vs Li/Li<sup>+</sup>.
